# Supplementary material
Source: PubMed Central journal article supplement (PMC8351620)

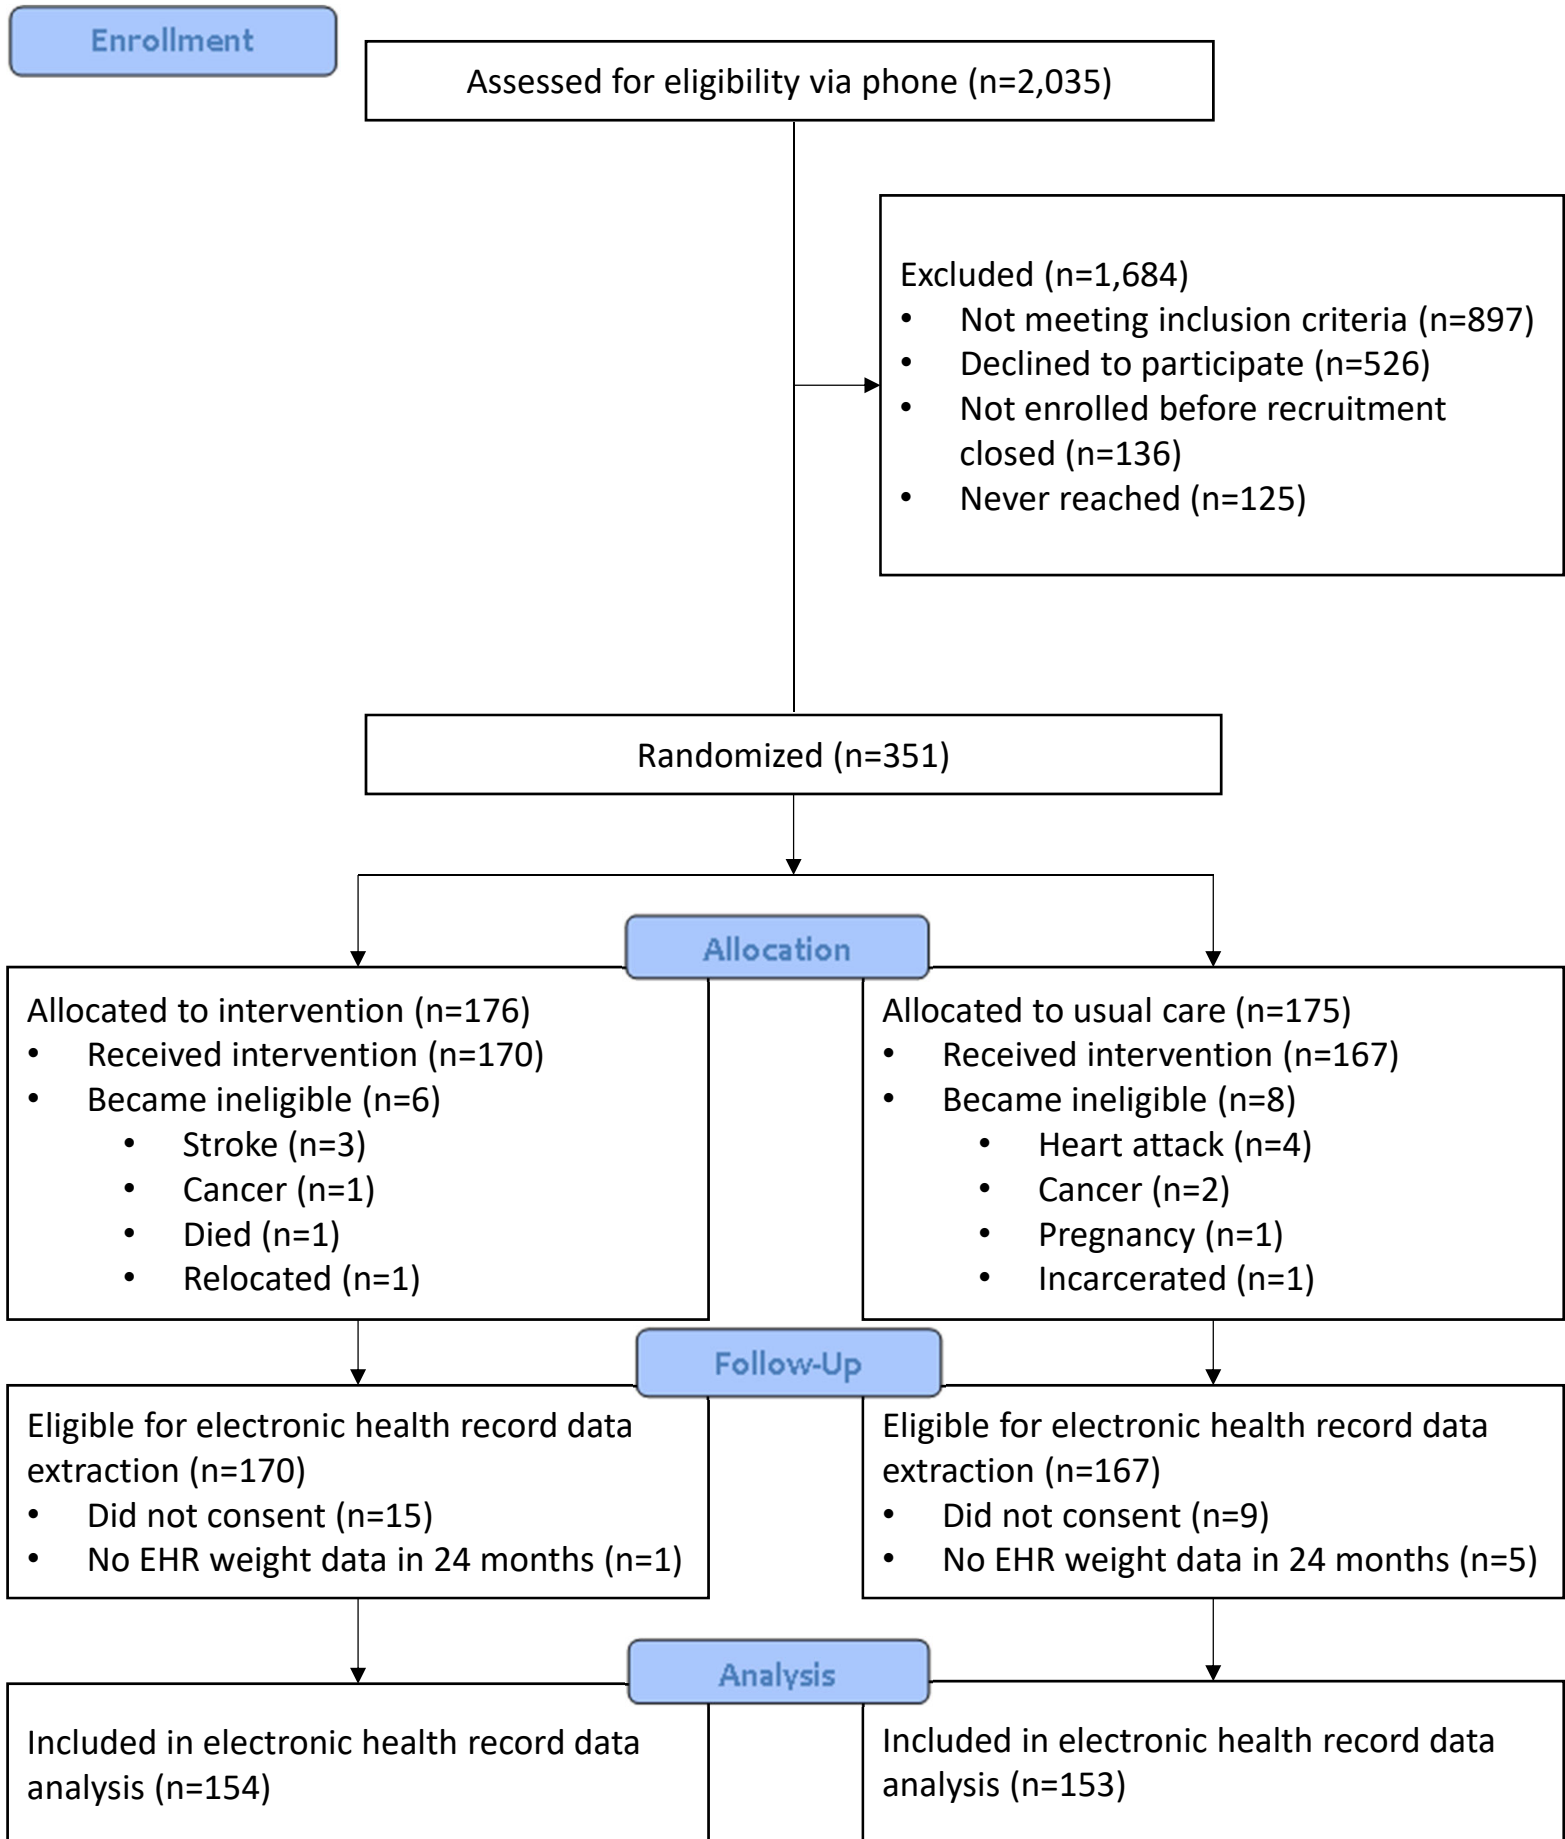

**Figure S1.** CONSORT 2010 flow diagram for the Track randomized trial

Supplement: NIHMS1621636-supplement-supp_figS1.pdf [file NIHMS1621636-supplement-supp_figS1.pdf]

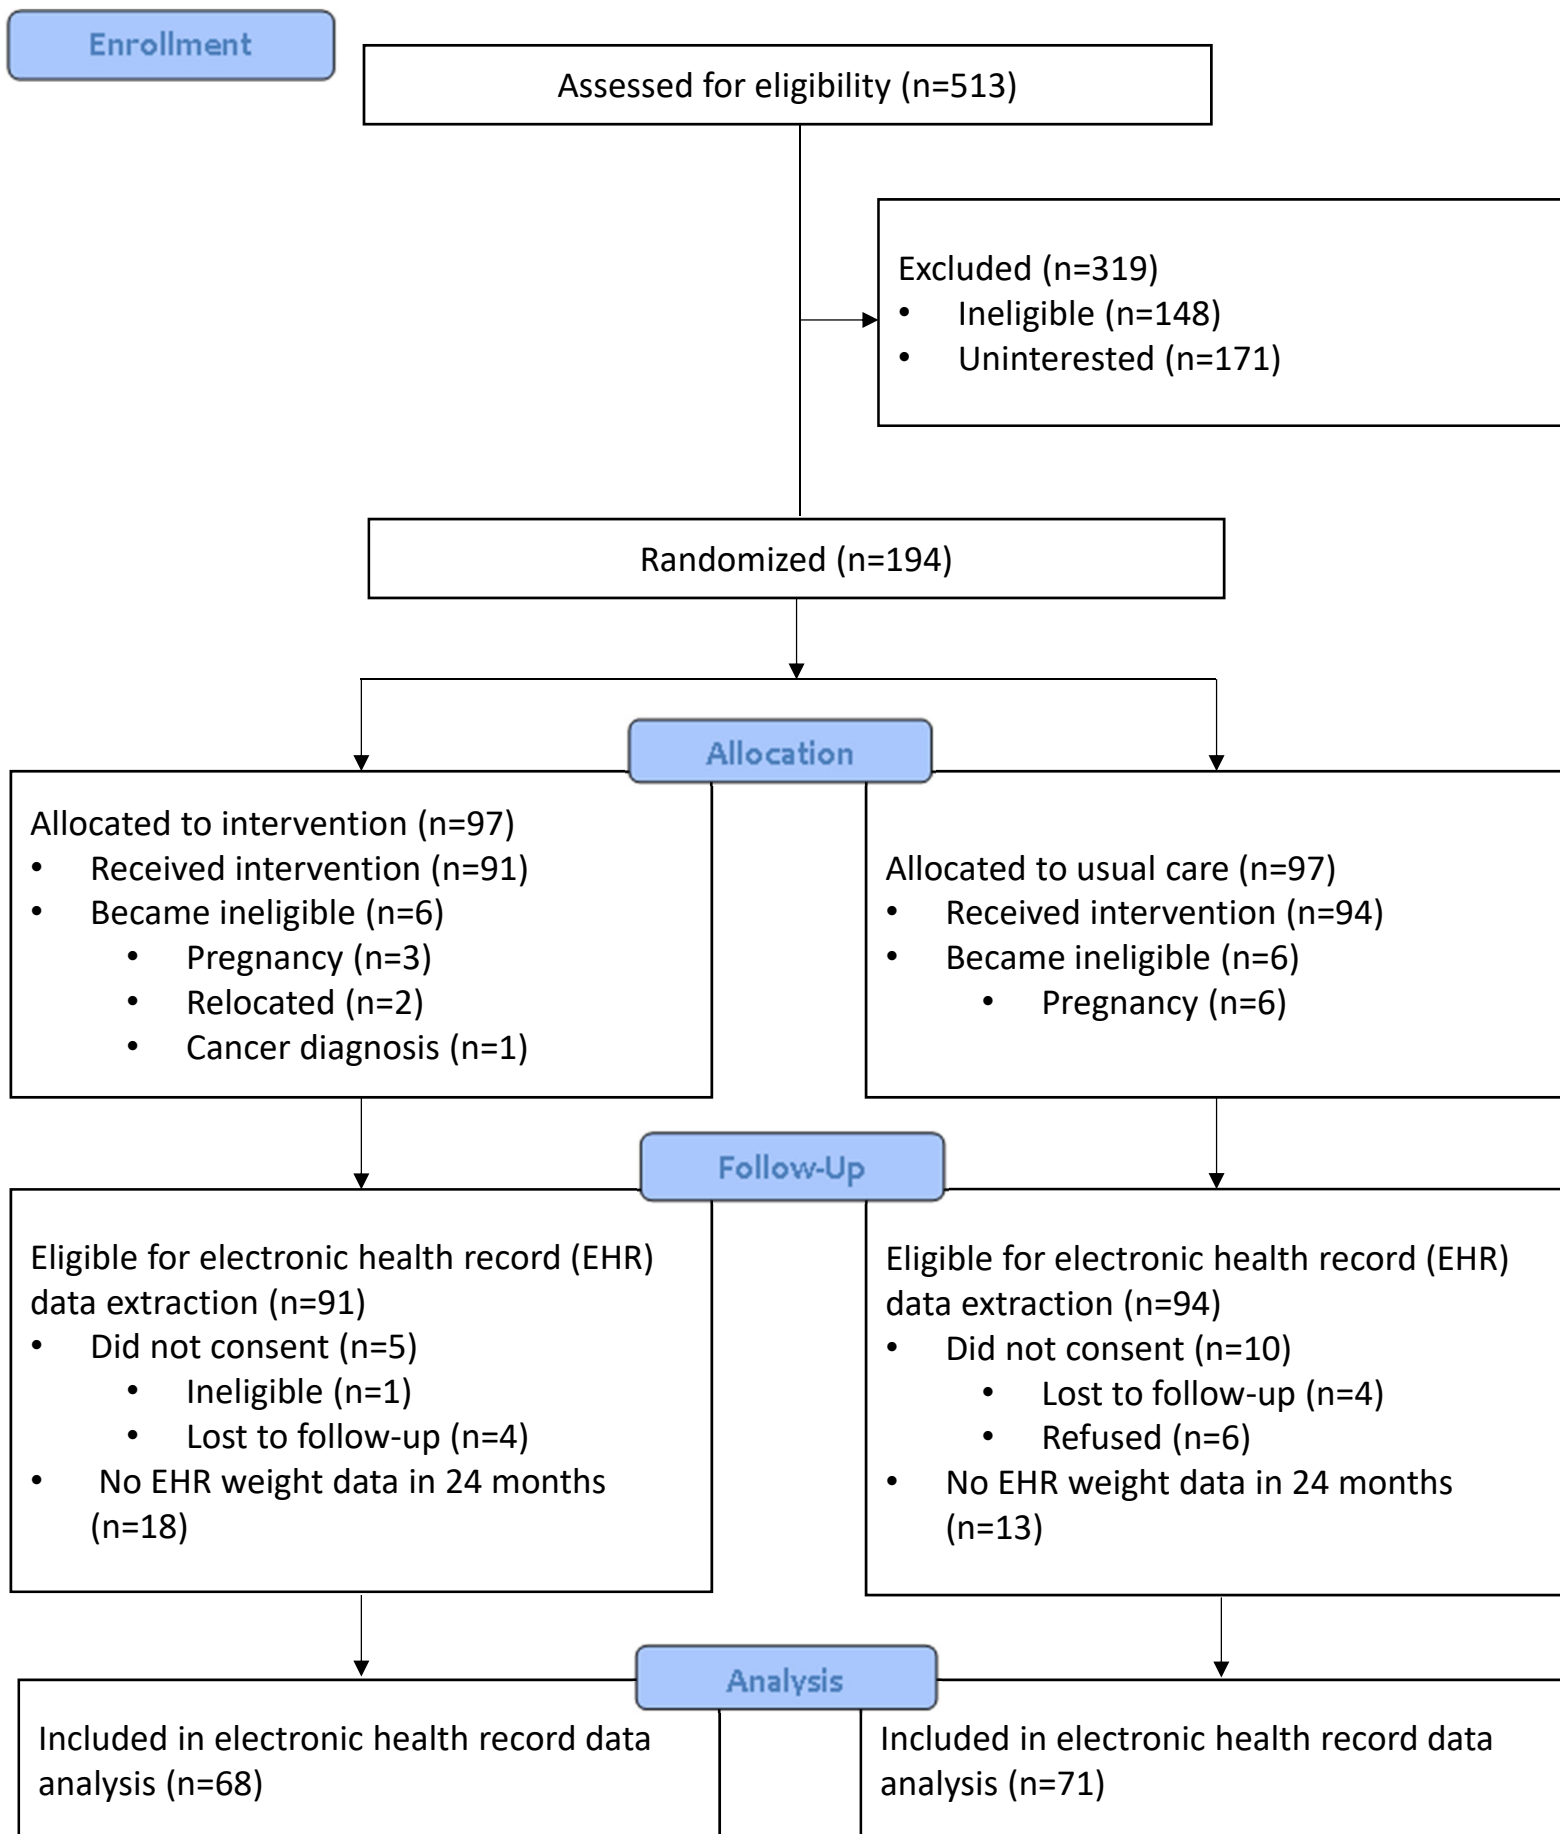

**Figure S2.** CONSORT 2010 flow diagram for the Shape randomized trial

Supplement: NIHMS1621636-supplement-supp_figS2.pdf [file NIHMS1621636-supplement-supp_figS2.pdf]
